# Supplementary material for: The Impact of TPA Auxiliary Donor and the π-Linkers on the Performance of Newly Designed Dye-Sensitized Solar Cells: Computational Investigation
Source: MDPI journal article supplement (doi:10.3390/ma16041611), 2023-02-15
Supplement: s1 [file s1]

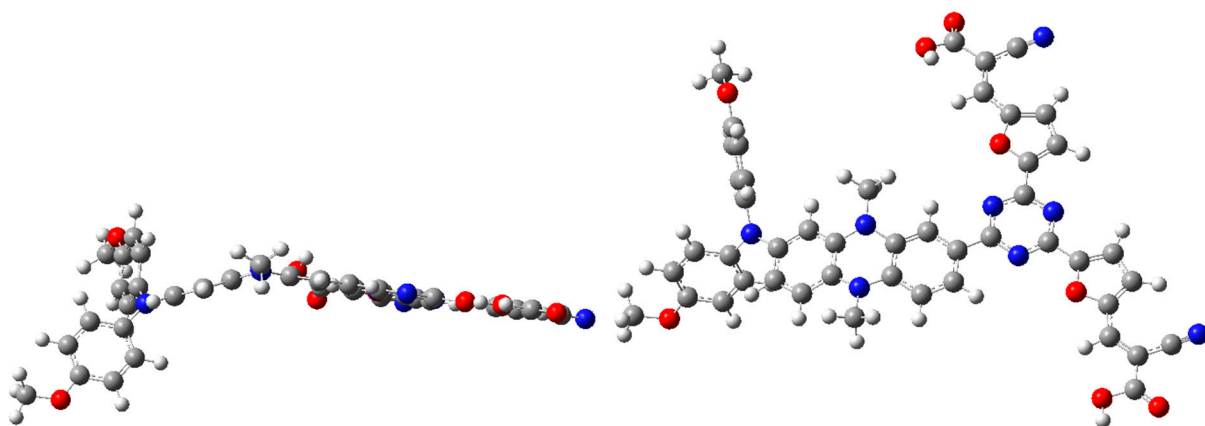

**2PhNN**

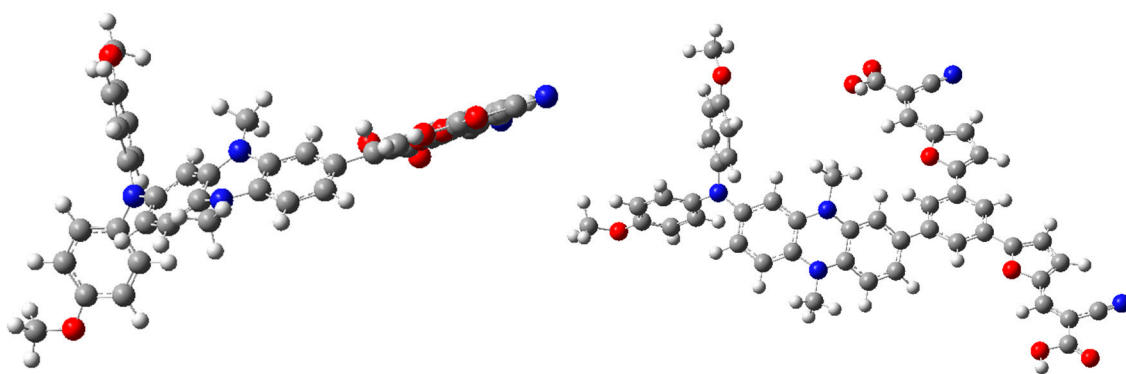

**2PhNC**

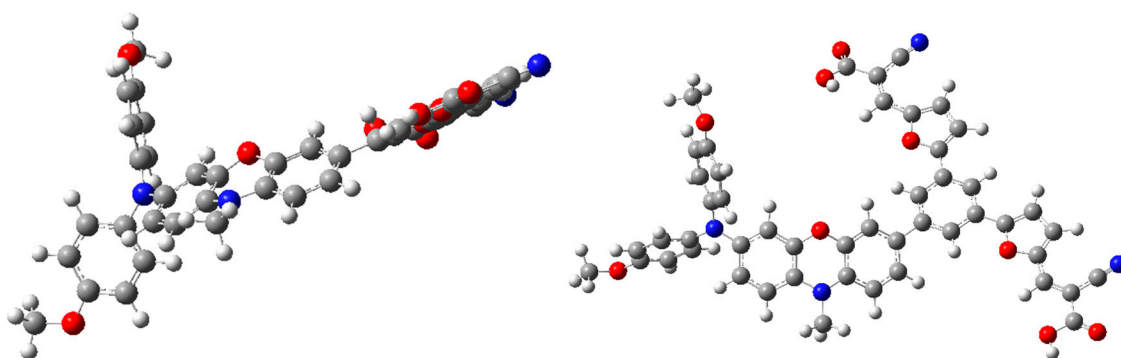

**2PhOC**

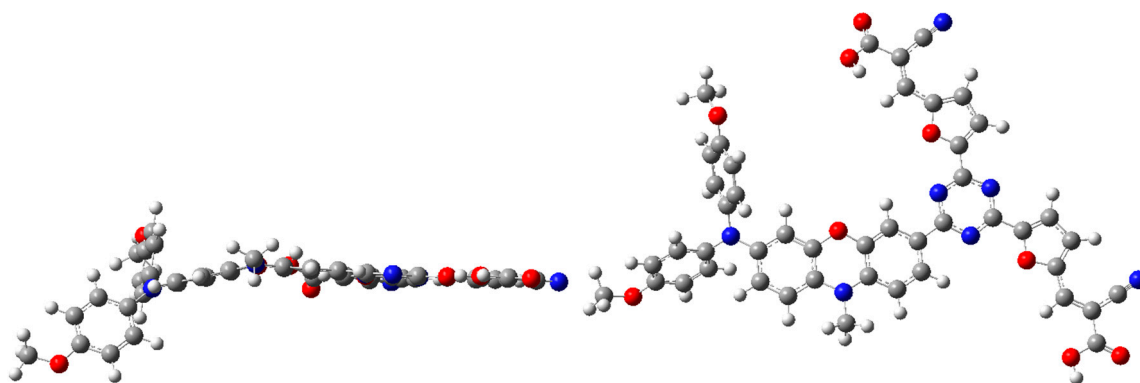

**2PhON**

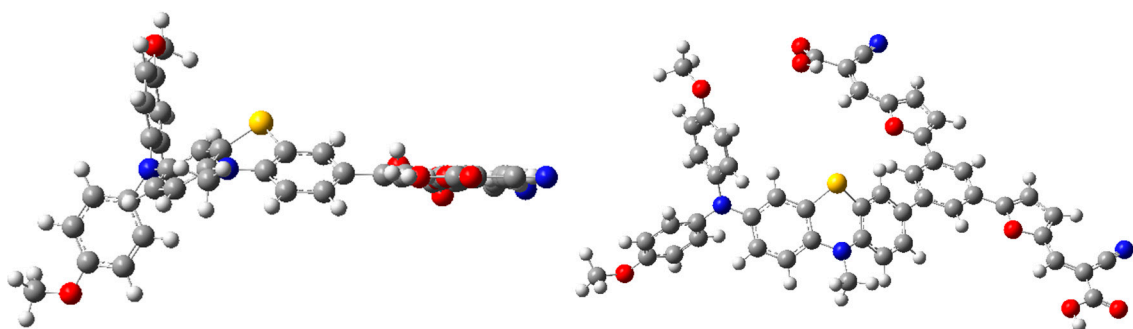

2PhSC

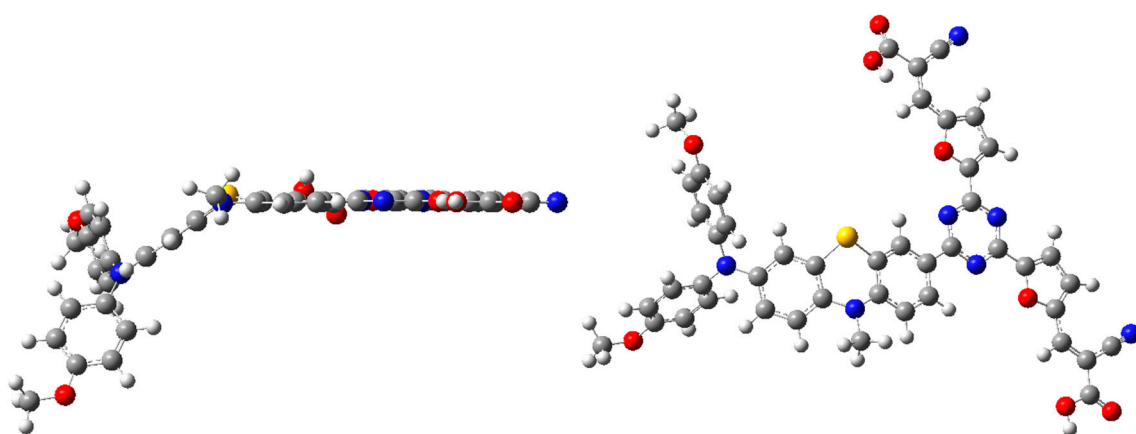

2PhSN

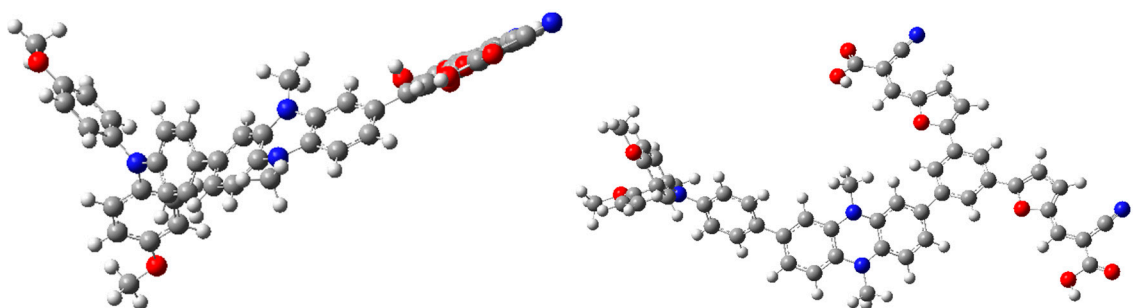

TPhNC

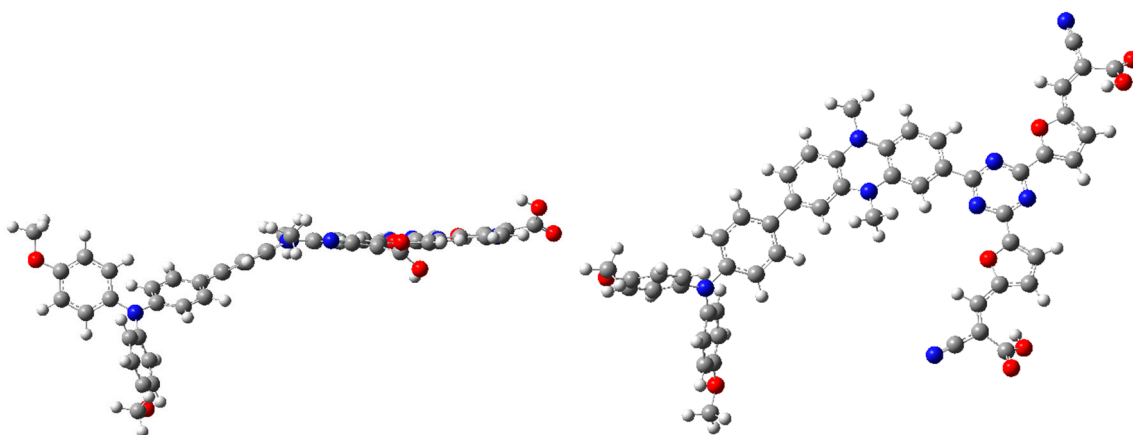

TPhNN

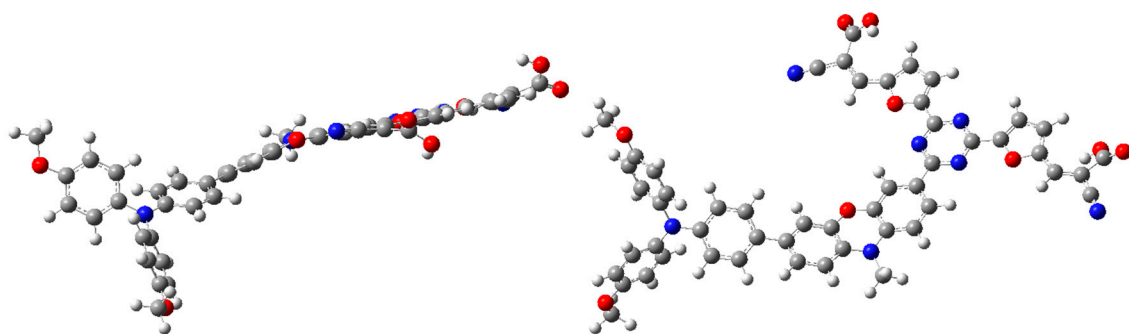

**TPhON**

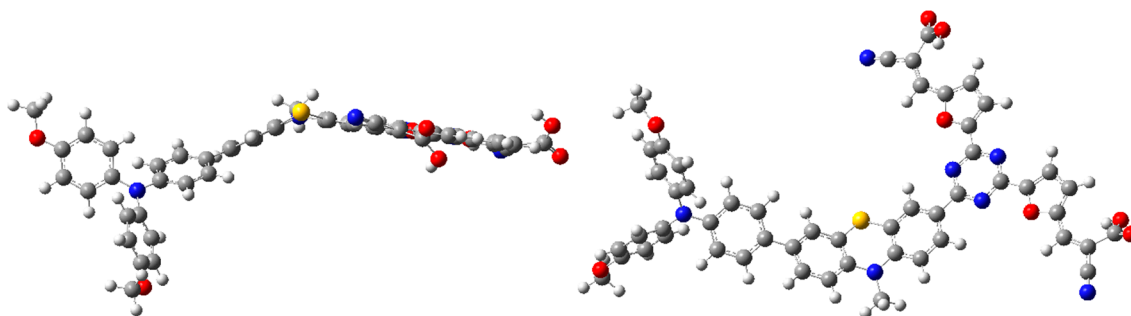

**TPhSN**

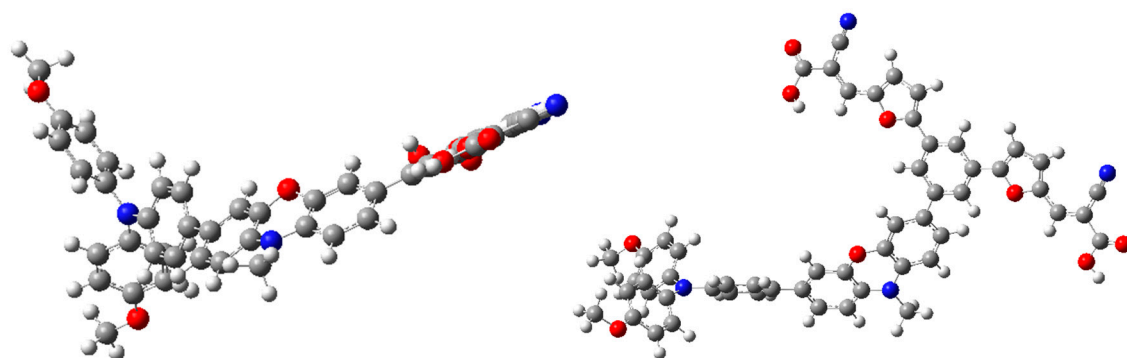

**TPhOC**

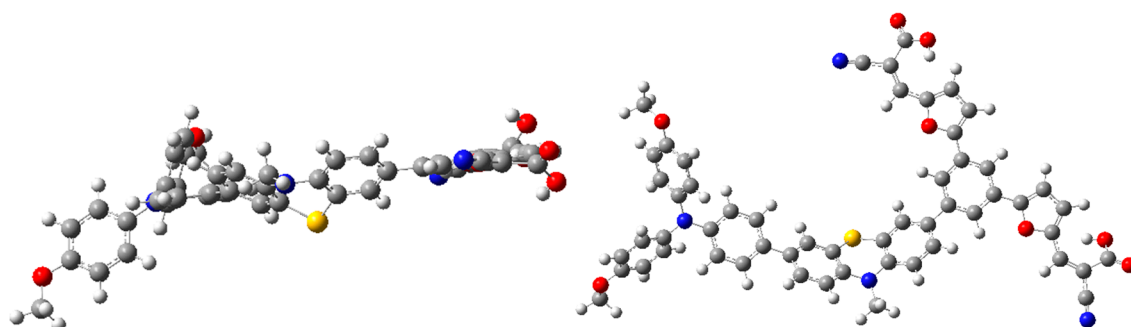

**TPhSC**

**Figure S1:** Optimized structure of the studied dyes.

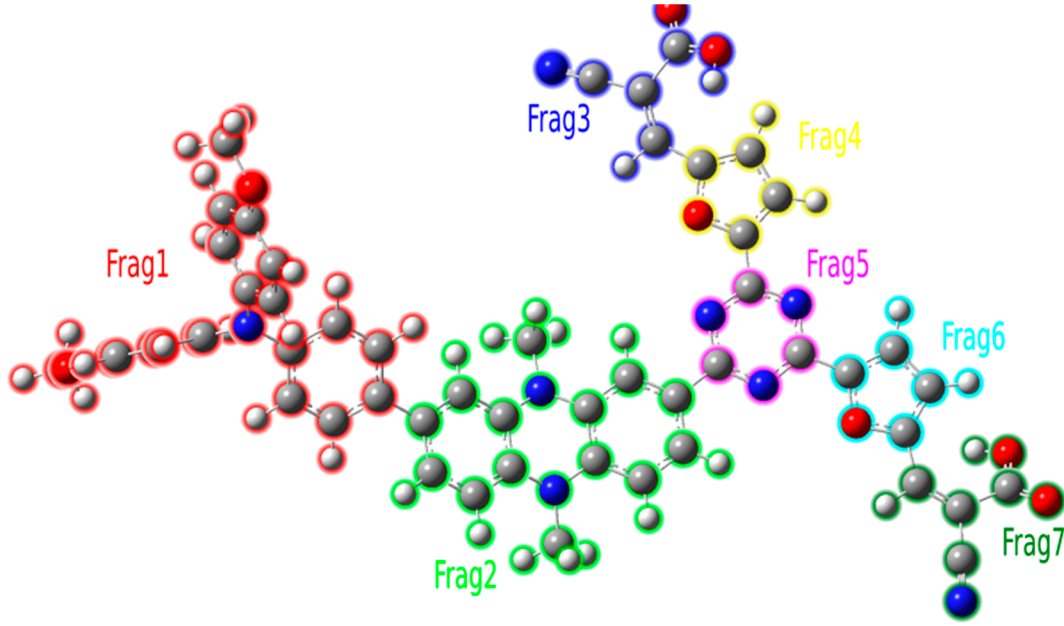

**Figure S2:** The structure of dyes with different fragments.

### Theoretical background

Generally, the efficiency PCE of DSSCs can be calculated from the  $V_{oc}$ ,  $J_{sc}$ , fill factor (FF) and the incident solar power on the cell ( $P_{in}$ ) and the maximum power ( $P_{max}$ ). The calculated efficiency can be expressed as follows [1,2]:

$$PCE(\eta\%) = \frac{P_{max}}{P_{in}} = \frac{V_{oc} J_{sc}}{P_{in}} FF. 100\% \quad (1)$$

The fill factor (FF) is defined as the ratio of the maximum power that the battery can yield to the theoretical maximum output power of the product of the  $J_{sc}$  and  $V_{oc}$ .

The  $J_{sc}$  is a key parameter for the DSSCs devices, which can be calculated with the following equation (2):

$$J_{sc} = q \int_0^\infty LHE(\lambda) \eta_{inj} \eta_{coll} \times I_s(\lambda) d\lambda \quad (2)$$

Where  $LHE(\lambda)$  symbolizes the Light-Harvesting Efficiency and  $\eta_{inj}$  is the electron injection efficiency,  $\eta_{coll}$  is the charge collection efficiency, and  $I_s(\lambda)$  is the corresponding photon flux of the solar radiation spectrum at a fixed wavelength.

Where  $LHE(\lambda)$  symbolizes the light-harvesting efficiency, and  $\eta_{inj}$  is the electron injection efficiency,  $\eta_{coll}$  is the charge collection efficiency, and  $I_s(\lambda)$  is the corresponding photon flux of the solar radiation spectrum at a fixed wavelength.

The light harvesting efficiency is determined by:

$$LHE(\lambda) = 1 - 10^{-f}$$

Where  $f$  is the oscillator strength corresponding to the maximum absorption wavelength. The understanding of the molecular electronic properties in the excited state of the studied dyes is crucial to predict the solar cells properties of DSSCs. The efficiency of photovoltaic cells depends on the rate of electron injection and electron regeneration. The rate of electron injection ( $\Delta G^{inj}$ ) is defined as [3]:

$$\Delta G_{inj} = E_{dye}^* - E_{CB} \quad (3)$$

$E_{dye}^*$  : The oxidation of the excited dye and  $E_{CB}$  is the conduction band of the  $TiO_2$ .

$$E_{dye}^* = E_{dye} - E_{0-0} \quad (4)$$

$E_{dye}$  : The redox potential of the ground state of the dye and  $E_{0-0}$  is the vertical transition energy associated with the  $\lambda_{max}$ . The rate of electron regeneration  $\Delta G_{reg}$  is defined as follows:

$$\Delta G_{reg} = E_{(I^-/I_3^-)} - E_{dye} \quad (5)$$

$E_{(I^-/I_3^-)}$  is the redox potential energy of  $(I^- / I_3^-)$ . When the rate of electron recombination

$\Delta G_{rec}$  is defined as:  $\Delta G_{rec} = E_{CB} - E_{dye}$

The processes of electrons injection, dye regeneration, and electrons transfer play a significant role in the overall power conversion efficiency. Large electron injection result in a high power conversion efficiency. The values of  $E_{OX}^{dye}$ ,  $E_{0-0}$ ,  $E_{OX}^{dye*}$ ,  $\Delta G^{inject}$ ,  $|V_{RP}|$ ,  $\Delta G^{reg}$  of all designed dyes calculated at a B3LYP/6-31G(d,p) level, and their values are listed in Table 3a.

## References

- [1] G.P. Smestad, M. Grätzel, Demonstrating electron transfer and nanotechnology: A natural dye-sensitized nanocrystalline energy converter, J. Chem. Educ. 75 (1998) 752–756. <https://doi.org/10.1021/ed075p752>.
- [2] Z. Zhao, G. Yu, Q. Chang, X. Liu, Y. Liu, L. Wang, Z. Liu, Z. Bian, W. Liu, C. Huang, Carbazolylphosphines and carbazolylphosphine oxides: Facilely synthesized host materials with tunable mobilities and high triplet energy levels for blue phosphorescent OLEDs, J. Mater. Chem. C. 5 (2017) 7344–7351. <https://doi.org/10.1039/c7tc01594a>.
- [3] R. Katoh, A. Furube, Electron injection efficiency in dye-sensitized solar cells, J. Photochem. Photobiol. C Photochem. Rev. 20 (2014) 1–16. <https://doi.org/10.1016/j.jphotochemrev.2014.02.001>.
